# Supplementary material for: Bayesian Molecular Dating Analyses Combined with Mutational Profiling Suggest an Independent Origin and Evolution of SARS-CoV-2 Omicron BA.1 and BA.2 Sub-lineages
Source: Preprints.org preprint supplement (doi:10.20944/preprints202210.0404.v1), 2022-10-26
Supplement: Supplementary file 1 [file Table S1.xlsx]

## Sheet: BA.1
	No.	Model	#NAME?	df	AIC	AICc	BIC
	1	JC	46674.5	333	94015	94022.6	96779.1
	2	JC+I	46375.7	334	93419.4	93427	96191.7
	3	JC+G4	46529.4	334	93726.8	93734.4	96499.2
	4	JC+I+G4	46424.9	335	93519.7	93527.4	96300.4
	5	F81+F	45744.5	336	92161	92168.7	94949.9
	6	F81+F+I	45453.9	337	91581.7	91589.5	94379
	7	F81+F+G4	45600.1	337	91874.3	91882	94671.5
	8	F81+F+I+G4	45459.2	338	91594.5	91602.3	94400
	9	K2P	46486.7	334	93641.3	93648.9	96413.7
	10	K2P+I	46187.4	335	93044.8	93052.5	95825.5
	11	K2P+G4	46341.5	335	93353	93360.6	96133.6
	12	K2P+I+G4	46196.8	336	93065.5	93073.2	95854.5
	13	HKY+F	45546.4	337	91766.7	91774.5	94564
	14	HKY+F+I	45264.5	338	91205	91212.8	94010.6
	15	HKY+F+G4	45402.9	338	91481.8	91489.6	94287.4
	16	HKY+F+I+G4	45268.5	339	91215	91222.8	94028.9
	17	TNe	46474	335	93618	93625.7	96398.7
	18	TNe+I	46179.2	336	93030.3	93038	95819.3
	19	TNe+G4	46329.3	336	93330.5	93338.2	96119.5
	20	TNe+I+G4	46186.5	337	93047.1	93054.8	95844.3
	21	TN+F	45533.2	338	91742.4	91750.2	94548
	22	TN+F+I	45257.7	339	91193.4	91201.3	94015.3
	23	TN+F+G4	45390.3	339	91458.6	91466.4	94272.5
	24	TN+F+I+G4	45260.1	340	91200.2	91208	94022.3
	25	K3P	46478.6	335	93627.1	93634.8	96407.8
	26	K3P+I	46179.7	336	93031.3	93039	95820.3
	27	K3P+G4	46333.7	336	93339.3	93347	96128.3
	28	K3P+I+G4	46188.4	337	93050.9	93058.6	95848.2
	29	K3Pu+F	45535.8	338	91747.6	91755.4	94553.2
	30	K3Pu+F+I	45255.2	339	91188.5	91196.3	94014.4
	31	K3Pu+F+G4	45392.5	339	91463.1	91470.9	94276.9
	32	K3Pu+F+I+G4	45258.7	340	91197.3	91205.2	94019.5
	33	TPM2+F	45543.8	338	91763.5	91771.3	94569.1
	34	TPM2+F+I	45262	339	91202	91209.9	94015.9
	35	TPM2+F+G4	45400.3	339	91478.7	91486.5	94292.5
	36	TPM2+F+I+G4	45265.6	340	91211.2	91219.1	94033.4
	37	TPM2u+F	45543.8	338	91763.6	91771.4	94569.1
	38	TPM2u+F+I	45262	339	91202.1	91209.9	94015.9
	39	TPM2u+F+G4	45400.4	339	91478.7	91486.6	94292.6
	40	TPM2u+F+I+G4	45265.6	340	91211.1	91219	94033.3
	41	TPM3+F	45546.5	338	91769	91776.8	94574.6
	42	TPM3+F+I	45264.3	339	91206.5	91214.4	94020.4
	43	TPM3+F+G4	45403.2	339	91484.4	91492.2	94298.3
	44	TPM3+F+I+G4	45268.1	340	91216.1	91224	94038.3
	45	TPM3u+F	45546.6	338	91769.1	91776.9	94574.7
	46	TPM3u+F+I	45264.3	339	91206.6	91214.5	94020.5
	47	TPM3u+F+G4	45403.3	339	91484.6	91492.4	94298.4
	48	TPM3u+F+I+G4	45268	340	91216.1	91224	94038.3
	49	TIMe	46466.3	336	93604.5	93612.2	96393.5
	50	TIMe+I	46171.5	337	93017	93024.8	95814.3
	51	TIMe+G4	46321.7	337	93317.3	93325.1	96114.6
	52	TIMe+I+G4	46173.3	338	93022.5	93030.3	95828.1
	53	TIM+F	45523.2	339	91724.4	91732.3	94538.3
	54	TIM+F+I	45249.6	340	91179.2	91187	94010.3
	55	TIM+F+G4	45380.6	340	91441.2	91449.1	94263.4
	56	TIM+F+I+G4	45247.7	341	91177.4	91185.3	94012.8
	57	TIM2e	46474.7	336	93621.4	93629.1	96410.4
	58	TIM2e+I	46179.9	337	93033.8	93041.5	95831.1
	59	TIM2e+G4	46329.6	337	93333.2	93341	96130.5
	60	TIM2e+I+G4	46180.7	338	93037.4	93045.2	95843
	61	TIM2+F	45531.5	339	91741	91748.8	94554.9
	62	TIM2+F+I	45256.6	340	91193.1	91201	94015.3
	63	TIM2+F+G4	45388.5	340	91456.9	91464.8	94279.1
	64	TIM2+F+I+G4	45254.2	341	91190.4	91198.3	94020.9
	65	TIM3e	46474.8	336	93621.5	93629.2	96410.5
	66	TIM3e+I	46176.1	337	93026.2	93033.9	95823.4
	67	TIM3e+G4	46330	337	93333.9	93341.7	96131.2
	68	TIM3e+I+G4	46177	338	93030	93037.8	95835.6
	69	TIM3+F	45534.2	339	91746.4	91754.3	94560.3
	70	TIM3+F+I	45258.7	340	91197.5	91205.4	94019.6
	71	TIM3+F+G4	45391.2	340	91462.4	91470.2	94284.5
	72	TIM3+F+I+G4	45256.2	341	91194.4	91202.3	94024.9
	73	TVMe	46478.6	337	93631.2	93638.9	96428.5
	74	TVMe+I	46175.6	338	93027.2	93035	95832.8
	75	TVMe+G4	46333.4	338	93342.8	93350.6	96148.4
	76	TVMe+I+G4	46176.9	339	93031.8	93039.6	95845.7
	77	TVM+F	45536.1	340	91752.2	91760.1	94574.4
	78	TVM+F+I	45254.5	341	91191	91198.9	94021.5
	79	TVM+F+G4	45392.6	341	91467.1	91475.1	94297.6
	80	TVM+F+I+G4	45252.4	342	91188.7	91196.7	94027.5
	81	SYM	46466	338	93608	93615.8	96413.6
	82	SYM+I	46167.1	339	93012.3	93020.1	95826.2
	83	SYM+G4	46321.1	339	93320.1	93328	96134
	84	SYM+I+G4	46166.8	340	93013.7	93021.6	95835.9
	85	GTR+F	45523	341	91728	91735.9	94558.4
	86	GTR+F+I	45247.8	342	91179.5	91187.5	94001.3
	87	GTR+F+G4	45380.1	342	91444.2	91452.2	94283
	88	GTR+F+I+G4	45243.9	343	91173.9	91181.9	94010.9
	Akaike Information Criterion: GTR+F+I+G4
	Corrected Akaike Information Criterion: GTR+F+I+G4
	Bayesian Information Criterion: GTR+F+I
	Best-fit model: GTR+F+I chosen according to BIC

## Sheet: BA.2
	No.	Model	#NAME?	df	AIC	AICc	BIC
	1	JC	42459.7	169	85257.5	85259.4	86659.8
	2	JC+I	42444.3	170	85228.6	85230.6	86639.3
	3	JC+G4	42451.9	170	85243.8	85245.8	86654.5
	4	JC+I+G4	42448.4	171	85238.9	85240.9	86657.9
	5	F81+F	41552.6	172	83449.1	83451.1	84876.4
	6	F81+F+I	41537.8	173	83421.6	83423.6	84857.1
	7	F81+F+G4	41544.8	173	83435.6	83437.7	84871.2
	8	F81+F+I+G4	41541.4	174	83430.8	83432.9	84874.7
	9	K2P	42415	170	85170	85172	86580.7
	10	K2P+I	42399.5	171	85141.1	85143.1	86560.1
	11	K2P+G4	42407.1	171	85156.2	85158.2	86575.2
	12	K2P+I+G4	42403.6	172	85151.3	85153.3	86578.5
	13	HKY+F	41504.8	173	83355.5	83357.6	84791.1
	14	HKY+F+I	41490.7	174	83329.4	83331.5	84773.3
	15	HKY+F+G4	41497.1	174	83342.2	83344.2	84786.1
	16	HKY+F+I+G4	41493.8	175	83337.6	83339.7	84789.8
	17	TNe	42400.9	171	85143.7	85145.7	86562.7
	18	TNe+I	42386.1	172	85116.1	85118.2	86543.4
	19	TNe+G4	42393.1	172	85130.2	85132.2	86557.5
	20	TNe+I+G4	42389.7	173	85125.4	85127.4	86560.9
	21	TN+F	41490.4	174	83328.7	83330.8	84772.6
	22	TN+F+I	41477.2	175	83304.4	83306.5	84756.6
	23	TN+F+G4	41482.8	175	83315.6	83317.6	84767.7
	24	TN+F+I+G4	41479.6	176	83311.2	83313.4	84771.7
	25	K3P	42410.9	171	85163.8	85165.8	86582.8
	26	K3P+I	42395.5	172	85134.9	85136.9	86562.2
	27	K3P+G4	42403.1	172	85150.1	85152.1	86577.4
	28	K3P+I+G4	42399.6	173	85145.1	85147.2	86580.7
	29	K3Pu+F	41499.9	174	83347.7	83349.8	84791.6
	30	K3Pu+F+I	41485.8	175	83321.7	83323.7	84773.8
	31	K3Pu+F+G4	41492.1	175	83334.1	83336.2	84786.3
	32	K3Pu+F+I+G4	41488.7	176	83329.5	83331.6	84790
	33	TPM2+F	41502.6	174	83353.3	83355.4	84797.2
	34	TPM2+F+I	41488.7	175	83327.3	83329.4	84779.5
	35	TPM2+F+G4	41494.9	175	83339.9	83341.9	84792
	36	TPM2+F+I+G4	41491.6	176	83335.2	83337.3	84795.7
	37	TPM2u+F	41502.5	174	83353	83355.1	84796.9
	38	TPM2u+F+I	41488.5	175	83327	83329.1	84779.2
	39	TPM2u+F+G4	41494.8	175	83339.6	83341.7	84791.8
	40	TPM2u+F+I+G4	41491.3	176	83334.7	83336.8	84795.2
	41	TPM3+F	41504.2	174	83356.5	83358.5	84800.3
	42	TPM3+F+I	41490	175	83330.1	83332.2	84782.2
	43	TPM3+F+G4	41496.5	175	83343	83345.1	84795.2
	44	TPM3+F+I+G4	41493.2	176	83338.4	83340.5	84798.8
	45	TPM3u+F	41504.2	174	83356.4	83358.4	84800.3
	46	TPM3u+F+I	41490	175	83330	83332	84782.1
	47	TPM3u+F+G4	41496.5	175	83343	83345	84795.1
	48	TPM3u+F+I+G4	41493.1	176	83338.3	83340.4	84798.8
	49	TIMe	42397.5	172	85139	85141	86566.3
	50	TIMe+I	42382.7	173	85111.3	85113.4	86546.9
	51	TIMe+G4	42389.7	173	85125.4	85127.4	86561
	52	TIMe+I+G4	42385.3	174	85118.6	85120.7	86562.5
	53	TIM+F	41485.1	175	83320.3	83322.4	84772.5
	54	TIM+F+I	41472.1	176	83296.2	83298.3	84756.7
	55	TIM+F+G4	41477.6	176	83307.2	83309.3	84767.6
	56	TIM+F+I+G4	41474.4	177	83302.9	83305	84771.7
	57	TIM2e	42400	172	85144.1	85146.1	86571.4
	58	TIM2e+I	42385.3	173	85116.5	85118.6	86552.1
	59	TIM2e+G4	42392.2	173	85130.5	85132.5	86566.1
	60	TIM2e+I+G4	42388.8	174	85125.6	85127.7	86569.5
	61	TIM2+F	41488.7	175	83327.4	83329.4	84779.5
	62	TIM2+F+I	41475.6	176	83303.1	83305.2	84763.6
	63	TIM2+F+G4	41480.9	176	83313.9	83316	84774.4
	64	TIM2+F+I+G4	41477.8	177	83309.6	83311.7	84778.3
	65	TIM3e	42399.5	172	85142.9	85144.9	86570.2
	66	TIM3e+I	42384	173	85113.9	85116	86549.5
	67	TIM3e+G4	42391.6	173	85129.2	85131.2	86564.7
	68	TIM3e+I+G4	42388.1	174	85124.1	85126.2	86568
	69	TIM3+F	41489.7	175	83329.3	83331.4	84781.5
	70	TIM3+F+I	41476.3	176	83304.6	83306.7	84765.1
	71	TIM3+F+G4	41482	176	83316.1	83318.2	84776.6
	72	TIM3+F+I+G4	41478.8	177	83311.7	83313.8	84780.5
	73	TVMe	42408.9	173	85163.8	85165.8	86599.4
	74	TVMe+I	42393.1	174	85134.1	85136.2	86578
	75	TVMe+G4	42400.9	174	85149.9	85151.9	86593.7
	76	TVMe+I+G4	42397.4	175	85144.7	85146.8	86596.9
	77	TVM+F	41498.2	176	83348.3	83350.5	84808.8
	78	TVM+F+I	41484	177	83322.1	83324.2	84790.8
	79	TVM+F+G4	41490.5	177	83334.9	83337	84803.7
	80	TVM+F+I+G4	41487.1	178	83330.2	83332.4	84807.3
	81	SYM	42394.2	174	85136.5	85138.5	86580.4
	82	SYM+I	42378.9	175	85107.8	85109.9	86560
	83	SYM+G4	42386.4	175	85122.8	85124.9	86575
	84	SYM+I+G4	42382.9	176	85117.8	85119.9	86578.3
	85	GTR+F	41483.5	177	83320.9	83323.1	84789.7
	86	GTR+F+I	41470.2	178	83296.4	83298.5	84773.5
	87	GTR+F+G4	41475.9	178	83307.7	83309.9	84784.8
	88	GTR+F+I+G4	41472.7	179	83303.4	83305.6	84788.7
	Akaike Information Criterion: TIM+F+I
	Corrected Akaike Information Criterion: TIM+F+I
	Bayesian Information Criterion: TN+F+I
	Best-fit model: TN+F+I chosen according to BIC
