# Supplementary material for: Bayesian Molecular Dating Analyses Combined with Mutational Profiling Suggest an Independent Origin and Evolution of SARS-CoV-2 Omicron BA.1 and BA.2 Sub-lineages
Source: Preprints.org preprint supplement (doi:10.20944/preprints202210.0404.v1), 2022-10-26
Supplement: Supplementary file 3 [file Table S3.xlsx]

## Sheet: Sheet1
	BA.1			BA.2
	BA_1_1SEQ	BA_1_2SEQ	BA_1_3SEQ	BA_2_1SEQ	BA_2_2SEQ	BA_2_3SEQ
Date range	0.1315	0.1315	0.1315	0.1479	0.1479	0.1479
Slope (rate)	0.0010254	0.0020741	0.0012251	0.00065541	0.00087015	0.00062402
X-Intercept (TMRCA)	2021.48	2021.66	2021.54	2021.63	2021.73	2021.59
Correlation Coefficient	0.368	0.454	0.312	0.437	0.5491	0.4503
R squared	0.1358	0.206	0.097324	0.191	0.3015	0.2027
Residual Mean Squared	7.9452e-09	2.10711e-08	1.677e-08	2.4457e-09	2.0855e-09	1.8246e-09
